# Supplementary material
Source: PubMed Central journal article supplement (PMC5607430)
Supplement: IAI.00422-17_zii999092178s1.pdf [file IAI.00422-17_zii999092178s1.pdf]

## Supplement

### **17 $\beta$ -estradiol dysregulates host immune response to *Pseudomonas aeruginosa* respiratory infection and is modulated by estrogen receptor antagonism**

<sup>1</sup>Shadaan Abid, <sup>1</sup>ShangKui Xie, <sup>1</sup>Moumita Bose, <sup>2</sup>Philip W. Shaul, <sup>1</sup>Lance S. Terada, <sup>3</sup>Steven L. Brody, <sup>4</sup>Philip J. Thomas, <sup>5</sup>John A. Katzenellenbogen, <sup>5</sup>Sung Hoon Kim, <sup>6</sup>David E. Greenberg, <sup>1</sup>Raksha Jain

<sup>1</sup>Division of Pulmonary and Critical Care Medicine, Department of Internal Medicine, University of Texas Southwestern Medical Center, Dallas, TX 75390

<sup>2</sup>Center for Pulmonary and Vascular Biology, Department of Pediatrics, University of Texas Southwestern Medical Center, Dallas, TX 75390

<sup>3</sup>Division of Pulmonary and Critical Care Medicine, Washington University School of Medicine, St. Louis, MO 63110

<sup>4</sup>Department of Physiology, University of Texas Southwestern Medical Center, Dallas, TX 75390

<sup>5</sup>Department of Chemistry, University of Illinois at Urbana-Champaign, Urbana, IL 61801

<sup>6</sup>Division of Infectious Disease, Department of Internal Medicine, University of Texas Southwestern Medical Center, Dallas, TX 75390

## Supplementary methods

### ***Pseudomonas aeruginosa* growth assays**

For *in vitro* growth studies, overnight PAO1 cultures were washed and final pellets were re-suspended in 1 mL of LB broth. Concentrations were calculated using the optical density at 600 nm (OD600) and the previously determined number of colony-forming units (CFUs) for each strain to give CFUs/OD600. Cultures were diluted to a final concentration of  $5 \times 10^5$  CFUs in LB broth. Assays were performed in non-pyrogenic polystyrene 96-well plates (Falcon tissue culture plates; BD Biosciences, San Jose, California). PAO1 was incubated with 1nM, 10nM and 100nM estrogen in a total volume of 300 ul that contained Roswell Park Memorial Institute 1640 (RPMI) medium with L-glutamine (Invitrogen, Carlsbad, California). The plates were incubated at 37°C and after 3, 6, 9, 12, 18 hours, the culture supernatants were diluted and spread on LB plates and then counted for CFUs.

### **Mucoid conversion of *P. aeruginosa***

*P. aeruginosa* isolate PAO1 was cultured and grown at 37°C in LB broth with subculture into fresh vehicle, E2 10 nM and P4 10 nM. The cultures were then plated onto Spirit blue agar (Fluka, St. Louis, Missouri) to detect the formation of mucoid colonies at 24, 48 and 72 hours.(1)

**Table S1: Blood culture results at 24 hours**

| <b>Strain and Dose</b> | <b>PAO1<br/>3.5 x 10<sup>5</sup> CFU</b> | <b>PAO1<br/>8.5 x 10<sup>5</sup> CFU</b> | <b>M57-15<br/>1.2 x 10<sup>6</sup> CFU</b> |
|------------------------|------------------------------------------|------------------------------------------|--------------------------------------------|
| <b>Male</b>            | <b>Negative</b>                          | <b>Positive</b>                          | <b>Negative</b>                            |
| <b>Female</b>          | <b>Negative</b>                          | <b>Positive</b>                          | <b>Negative</b>                            |

**Table S2: Demographics of participants in neutrophil experiments (females with CF)**

| Subject Number     | Age (yrs)         | FEV1%             | BMI (kg/m <sup>2</sup> ) | Genotype     | Sputum bacteria |
|--------------------|-------------------|-------------------|--------------------------|--------------|-----------------|
| 1                  | 30                | 72                | 19.7                     | Neither      | OSSA            |
| 2                  | 33                | 117               | 22.6                     | delF508 homo | PA              |
| 3                  | 22                | 51                | 17.4                     | Neither      | AX              |
| 4                  | 27                | 30                | 27.2                     | delF508 het  | PA              |
| 5                  | 30                | 42                | 19.8                     | delF508 homo | PA, OSSA, SM    |
| 6                  | 32                | 53                | 22.7                     | Neither      | OSSA, PA        |
| 7                  | 22                | 62                | 18.2                     | delF508 het  | PA, SM          |
| 8                  | 27                | 69                | 24.2                     | delF508 homo | PA, MRSA        |
| 9                  | 22                | 36                | 21.8                     | delF508 homo | PA, MRSA        |
| 10                 | 22                | 35                | 17.1                     | delF508 het  | PA              |
| 11                 | 27                | 85                | 20.6                     | delF508 het  | OSSA            |
| 12                 | 30                | 54                | 20.8                     | delF508 het  | PA, OSSA        |
| 13                 | 42                | 118               | 23.3                     | Neither      | MA              |
| 14                 | 23                | 60                | 19.8                     | delF508 het  | AX, MRSA        |
| 15                 | 34                | 34                | 25.7                     | delF508 het  | PA, MA, SM      |
| 16                 | 19                | 101               | 23.7                     | Neither      | OSSA            |
| 17                 | 22                | 72                | 21.4                     | delF508 het  | PA, SM, MAI     |
| 18                 | 20                | 47                | 18.8                     | delF508 homo | PA              |
| 19                 | 24                | 22                | 14.8                     | delF508 homo | PA, MRSA        |
| 20                 | 21                | 67                | 19.2                     | delF508 het  | PA              |
| <b>Mean ± SEM:</b> | <b>26.5 ± 0.3</b> | <b>61.4 ± 1.4</b> | <b>20.9 ± 3.1</b>        |              |                 |

**Definition of abbreviations:**

Genotypes: delF508 homo – homozygous, delF508 het – heterozygous; neither – no delF508 mutations;

Sputum bacteria: OSSA - Oxacillin Sensitive *Staphylococcus aureus*; PA - *Pseudomonas aeruginosa*; AX - *Achromobacter xylosoxidans*; SM - *Stenotrophomonas maltophilia*; MRSA - Methicillin Resistant *Staphylococcus aureus*; MA - *Mycobacterium abscessus*; MAI - *Mycobacterium avium intracellulare*

Figure S1

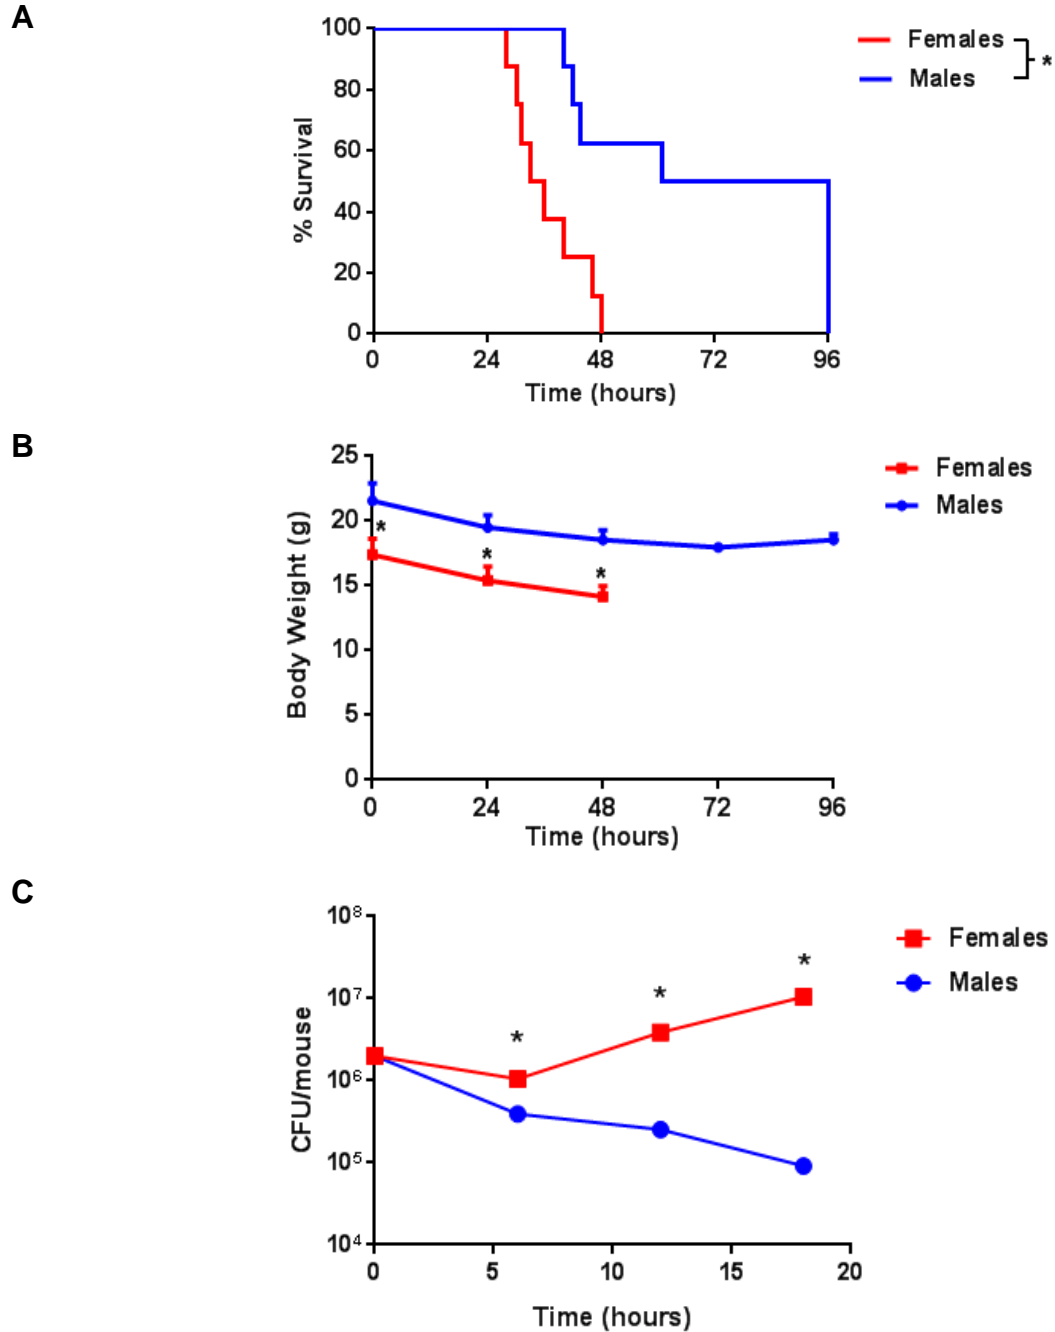

**Supplemental Figure S1. Survival in male versus females when age matched.** (A) Male and female C57BL/6 wild type mice were infected with *P. aeruginosa*,  $8.5 \times 10^5$  CFU and followed for up to 96 hours (n = 8 per group). Displayed are Kaplan-Meier survival plots; \*p < 0.05. (B) Body weights measured in experiment A. (C) Bacterial CFU remaining in the lungs of male versus female mice after infection with *P. aeruginosa* at  $3 \times 10^5$  CFU, (n = 6 mice per time point per group), p < 0.05. Data in B and C are mean  $\pm$  SEM, \*p < 0.05.

Figure S2

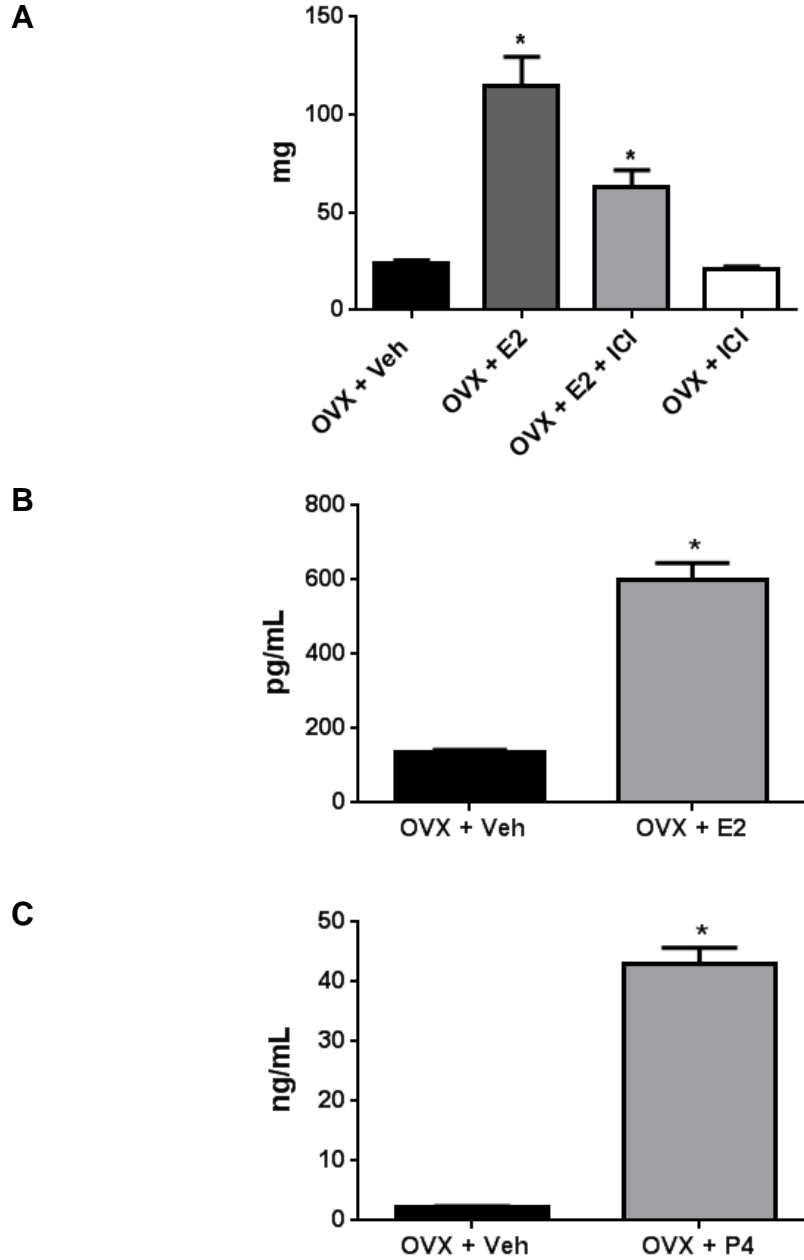

**Supplemental Figure S2. Estrogen and progesterone treatments in mice are physiologic.** (A) Uteri from C57BL/6 mice weighed 2 weeks after ovariectomy and hormone treatment (n = 8 per group). (B) 17β-estradiol levels measured from the blood of mice 2 weeks after ovariectomy and estrogen supplementation (n = 12 per group). (C) Progesterone levels measured from the blood of mice 2 weeks after ovariectomy and progesterone supplementation (n = 12 per group). Data in A, B, and C are displayed as mean ± SEM; \*p < 0.05 relative to vehicle group.

Figure S3.

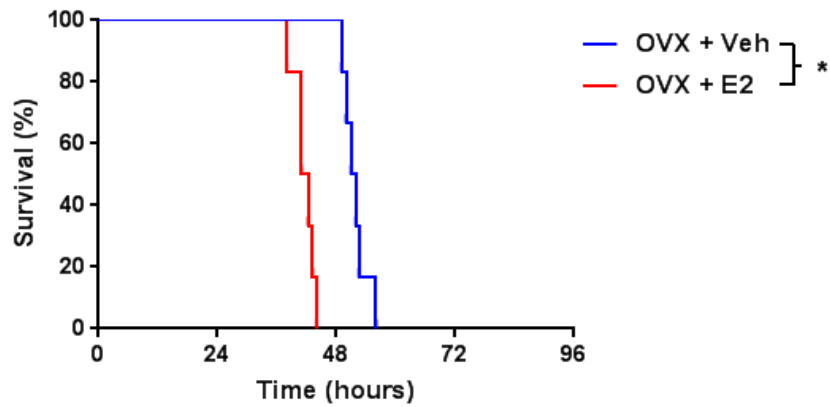

**Supplemental Figure S3. Survival in ovariectomized female mice infected with mucoid *P. aeruginosa*, M57-15.** Wild type C57BL/6 female mice were ovariectomized (OVX) and supplemented with physiologic doses of hormones: vehicle (Veh) or E2 (0.5ug/day) and infected with M57-15 at  $1.2 \times 10^6$  CFU. Displayed are Kaplan-Meier survival plots; \*p < 0.05.

Figure S4

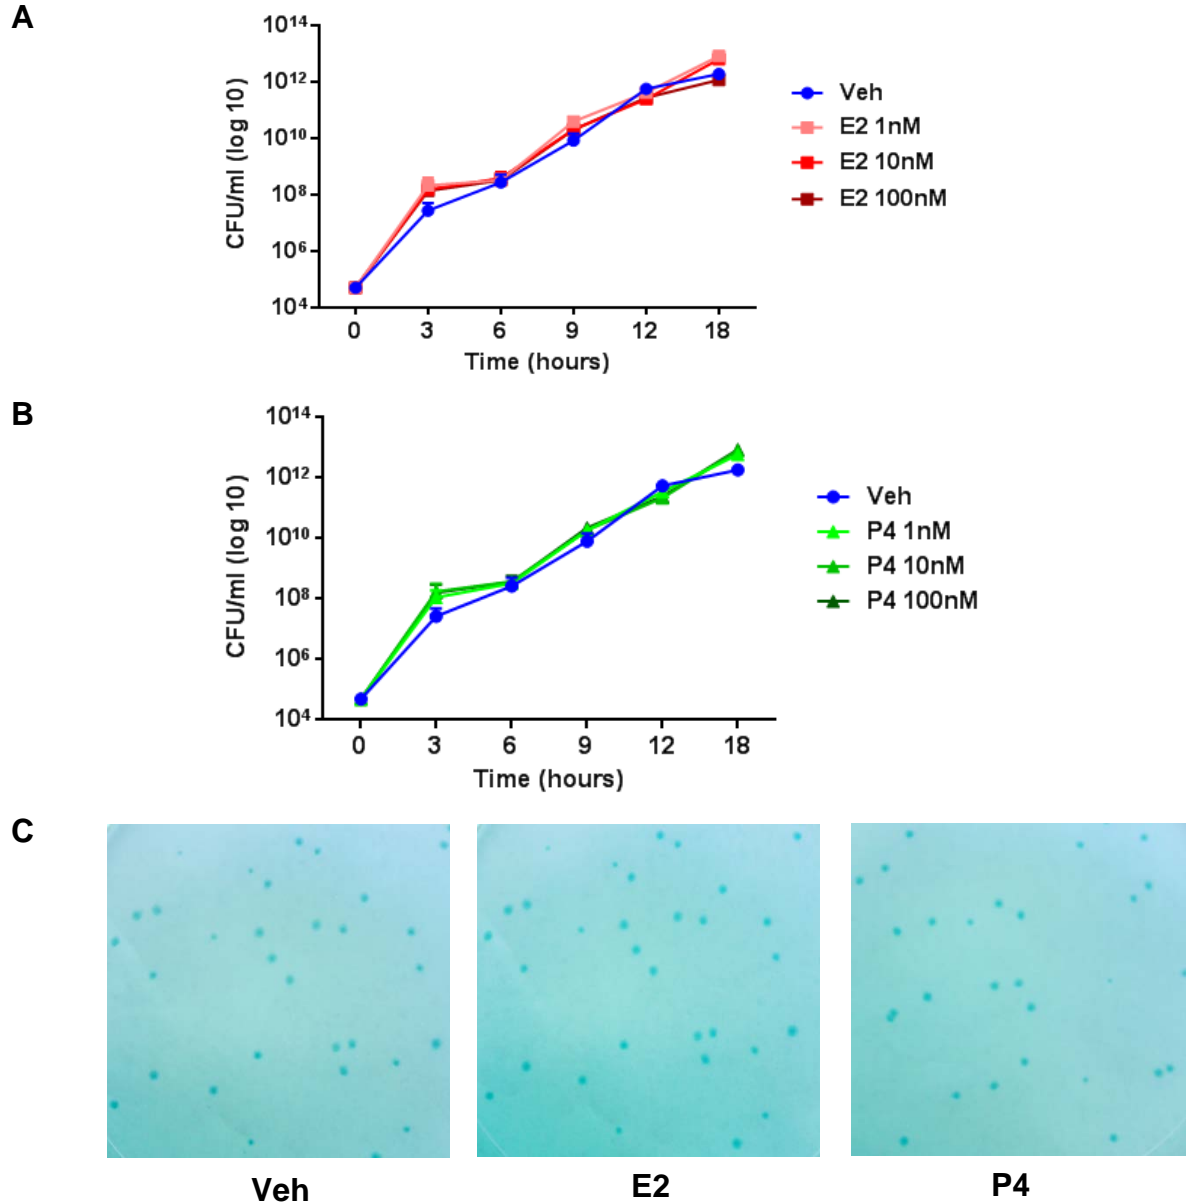

**Supplemental Figure S4. *P. aeruginosa* growth is insensitive to E2 or P4 stimulation.**

(A) *P. aeruginosa* was grown *in vitro* and treated with vehicle or escalating doses of 17 $\beta$ -estradiol (n = 3 per treatment group); p = 0.4687. (B) *P. aeruginosa* was grown *in vitro* and treated with vehicle or escalating doses of progesterone (n = 3 per treatment group); p = 0.448. (C) *P. aeruginosa* was grown for up to 72 hours with E2 (10 nM) or P4 (10 nM) on blue agar to evaluate the transformation from a non-mucoid to mucoid state. Shown are representative images at 72 hours (n = 3 treatment group).



**Figure S5**

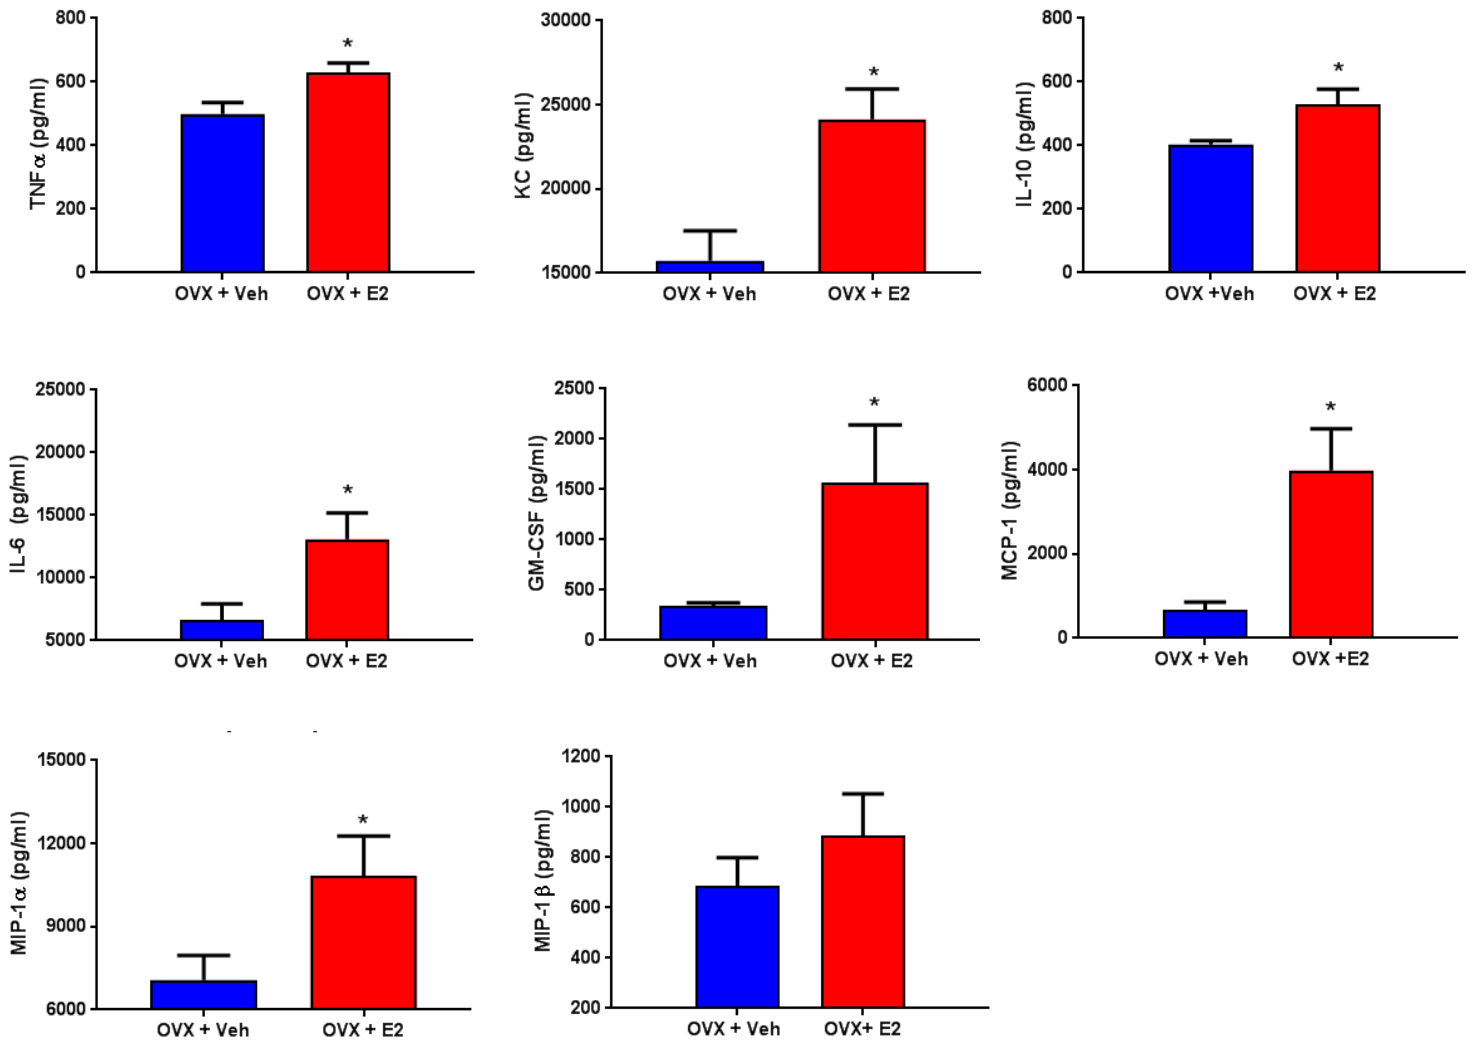

**Figure S5. Estrogen induces inflammation in the setting of *P. aeruginosa* infection.** Cytokine expression in whole lung samples of female mice ovariectomized and hormone treated as in Figure 1A taken 18 hours after infection (n = 7 mice per group). Data are expressed as mean  $\pm$  SEM, \*p < 0.05.

Figure S6.

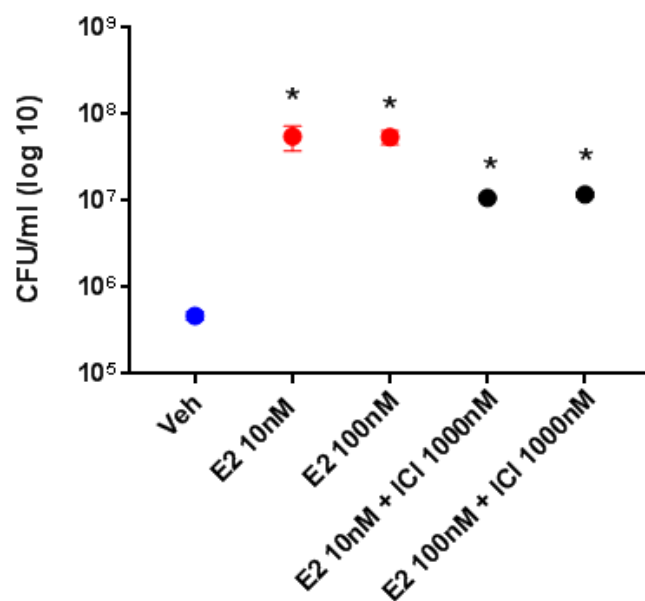

**Supplemental Figure S6.  $17\beta$ -estradiol impacts responses to *P. aeruginosa* infection of neutrophils from female subjects without CF.** Neutrophils from female subjects without CF treated *ex vivo* with E2 and ICI 182,780 (ICI) at indicated doses in *P. aeruginosa* killing assays at an MOI of 1:4. CFU = Colony forming units of *P. aeruginosa* (n = 6). Shown are mean  $\pm$  SEM; \*p < 0.05 relative to vehicle.

### **Supplementary References:**

1. Chotirmall SH, Smith SG, Gunaratnam C, Cosgrove S, Dimitrov BD, O'Neill SJ, Harvey BJ, Greene CM, McElvaney NG. 2012. Effect of estrogen on pseudomonas mucoidy and exacerbations in cystic fibrosis. *N Engl J Med* 366:1978-1986.
